# Supplementary material
Source: Springer Nature journal article supplement (https://www.springermedizin.de/resource/supplementary/12913_2010_1672_MOESM6_ESM.pdf/9528724)

Positive impact

Negative impact

Neutral

- Efficiency
- Profile
- Pressure
- No impact
- No comment

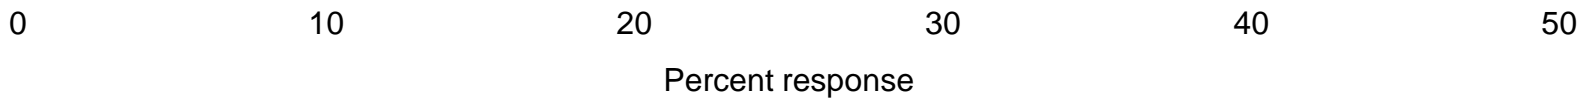

Supplement: MOESM6 [file 9528724]
